# Supplementary material for: Harmonic analysis of surface instability patterns on colloidal particles
Source: Royal Society of Chemistry journal article supplement (doi:10.1039/c8sm00383a), 2018-01-01
Supplement: c8sm00383a1.pdf [file c8sm00383a1.pdf]

## Electronic Supplementary Information

### Harmonic Analysis of Surface Instability Patterns on Colloidal Particles

Tero Kämäräinen,<sup>a</sup> Mariko Ago,<sup>a</sup> Jani Seitsonen,<sup>b</sup> Janne Raula,<sup>b</sup> Esko I. Kauppinen,<sup>b</sup> Janne Ruokolainen<sup>b</sup> and Orlando J. Rojas<sup>ab\*</sup>

<sup>a</sup> Department of Bioproducts and Biosystems, Aalto University, P.O. Box 16300, FI-00076 Aalto, Finland

<sup>b</sup> Department of Applied Physics, Aalto University, P.O. Box 15100, FI-00076 Aalto, Finland

\* Corresponding author: orlando.rojas@aalto.fi

**Table S1** Numerical values ( $\pm 95\%$  confidence interval) of particle parameters: root-mean-square surface roughness  $\sigma$ , initial aerosol droplet radius  $R_I$ , buckling transition radius  $R_B$ , final mean spherical radius  $\langle R_F \rangle$ , spherical harmonic mean sphere radius  $R_S$ , final surface area  $A_F$  and final volume  $V_F$ .

| Parameter                  | C1                  | C2                  | W3                  |
|----------------------------|---------------------|---------------------|---------------------|
| $\sigma$ (nm)              | 26.1                | 36.0                | 29.7                |
| $R_I$ (nm)                 | 498                 | 668                 | 1181                |
| $R_B$ (nm)                 | 140                 | 196                 | 283                 |
| $\langle R_F \rangle$ (nm) | 103.7               | 138.8               | 235.9               |
| $R_S$ (nm)                 | 92.3                | 126.2               | 233.8               |
| $A_F$ (nm <sup>2</sup> )   | $2.456 \times 10^5$ | $4.842 \times 10^5$ | $1.007 \times 10^6$ |
| $V_F$ (nm <sup>3</sup> )   | $3.979 \times 10^6$ | $9.624 \times 10^6$ | $5.303 \times 10^7$ |

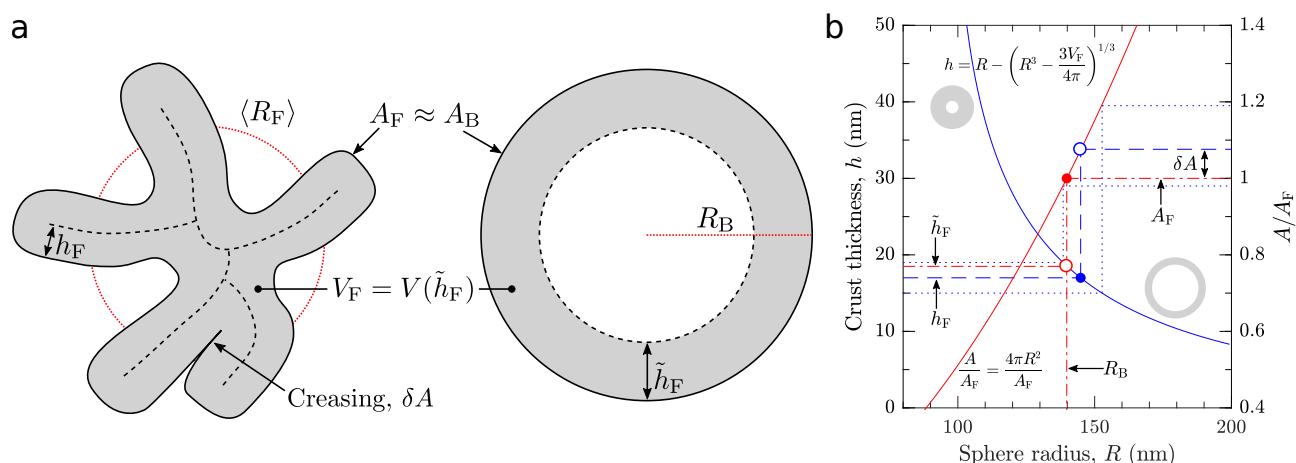

**Fig. S1** (a) A schematic illustration of the particle at time  $t = t_F$  (left) and at its pre-buckled state accompanied with different variables used in this study: radius  $R$ , mean spherical radius  $\langle R_F \rangle$ , crust thickness  $h$ , volume  $V$  and surface area  $A$ . (b) Estimation of the hidden surface area fraction due to creasing (self-contact) for C1. In the left vertical axis, crust thickness as a function of sphere radius needed to reproduce the final particle volume  $V_F$ . The two annuli represent schematically the shape transition as  $R$  increases, whereby a hollow cavity of larger volume is needed to keep the solid volume constant. Following the blue dashed line, an estimate for  $\delta A = 0.07^{+0.12}_{-0.09}$  can be calculated from the measured crust thickness  $h_F = 17$  nm (for C2,  $\delta A = 0.01^{+0.09}_{-0.07}$ ). The blue dotted lines represent the 95 % confidence bounds for the crust thickness measurement ( $\pm 2$  nm). In the right vertical axis, sphere surface area normalized with respect to the final surface area  $A_F$  determined from the tomogram. The red dash-dot line shows the buckling transition radius  $R_B$  as well as the calculated crust thickness  $\tilde{h}_F = 18.6$  nm when the volume of the crust equals  $V_F$ .

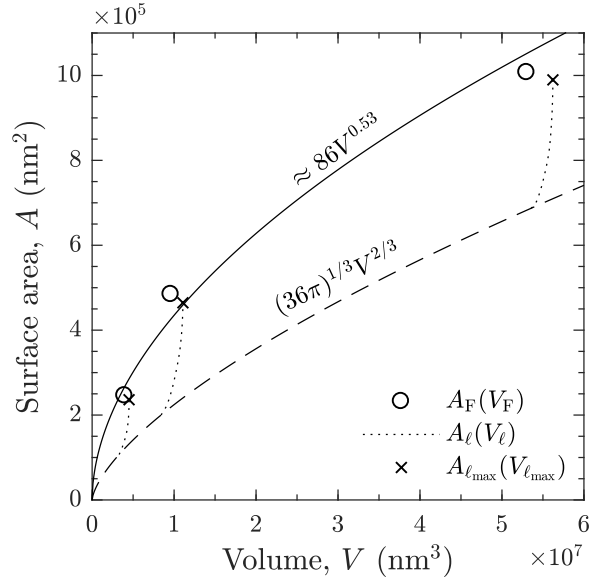

**Fig. S2** Surface area  $A$  as a function of volume  $V$ . The dashed line represents  $A(V)$  of a sphere whereas the dotted lines represent the  $A(V)$  evolution of the spherical harmonic models as the maximum harmonic degree  $\ell_{\max}$  used in the reconstructions is increased from zero to its final value 64 (marked by  $\times$ ). Hollow circles show the final surface area  $A_F$  as a function of the final volume  $V_F$  determined from the tomograms, with the solid line showing their power law fit.

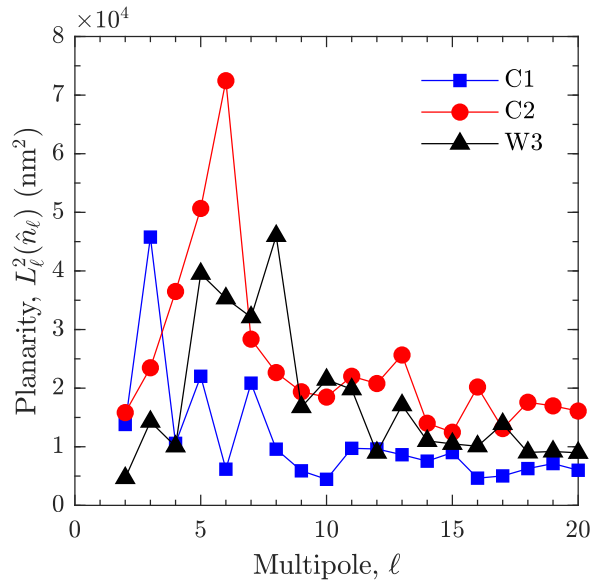

**Fig. S3** Value of multipole  $r_\ell(\theta, \phi)$  planarity measure  $L_\ell^2(\hat{n}_\ell)$  when the multipole is aligned with its preferred axis  $\hat{n}_\ell$ .
